# Supplementary material for: A diverse virome in kidney transplant patients contains multiple viral subtypes with distinct polymorphisms
Source: PubMed Central journal article supplement (PMC5025891; doi:10.1038/srep33327), 2016-09-16
Supplement: srep33327-s1.pdf [file srep33327-s1.pdf]

## SUPPLEMENTARY DATA

### **A diverse virome in kidney transplant patients contains multiple viral subtypes with distinct polymorphisms**

Asha Rani<sup>1†</sup>, Ravi Ranjan<sup>1†</sup>, Halvor S. McGee<sup>1</sup>, Ahmed Metwally<sup>1,2</sup>, Zahraa Hajjiri<sup>1</sup>, Daniel C. Brennan<sup>3</sup>, Patricia W. Finn<sup>1</sup>, David L. Perkins<sup>1,2,4,\*</sup>

<sup>1</sup>Department of Medicine, University of Illinois, Chicago, IL 60612 USA

<sup>2</sup>Department of Bioengineering, University of Illinois, Chicago, IL 60612 USA

<sup>3</sup>Division of Renal Diseases, Washington University School of Medicine, St. Louis, MO 63110 USA

<sup>4</sup>Department of Surgery, University of Illinois, Chicago, IL 60612 USA

#### **\*Corresponding author:**

David Perkins, MD, PhD

University of Illinois at Chicago

Department of Medicine, MC 787

840 S Wood Street, Suite 1020N CSB

Chicago IL 60612 USA

Email: [perkinsd@uic.edu](mailto:perkinsd@uic.edu) , Phone: 312-413-3382, Fax: 312-355-0499

<sup>†</sup>These authors contributed equally and considered as co-first authors.

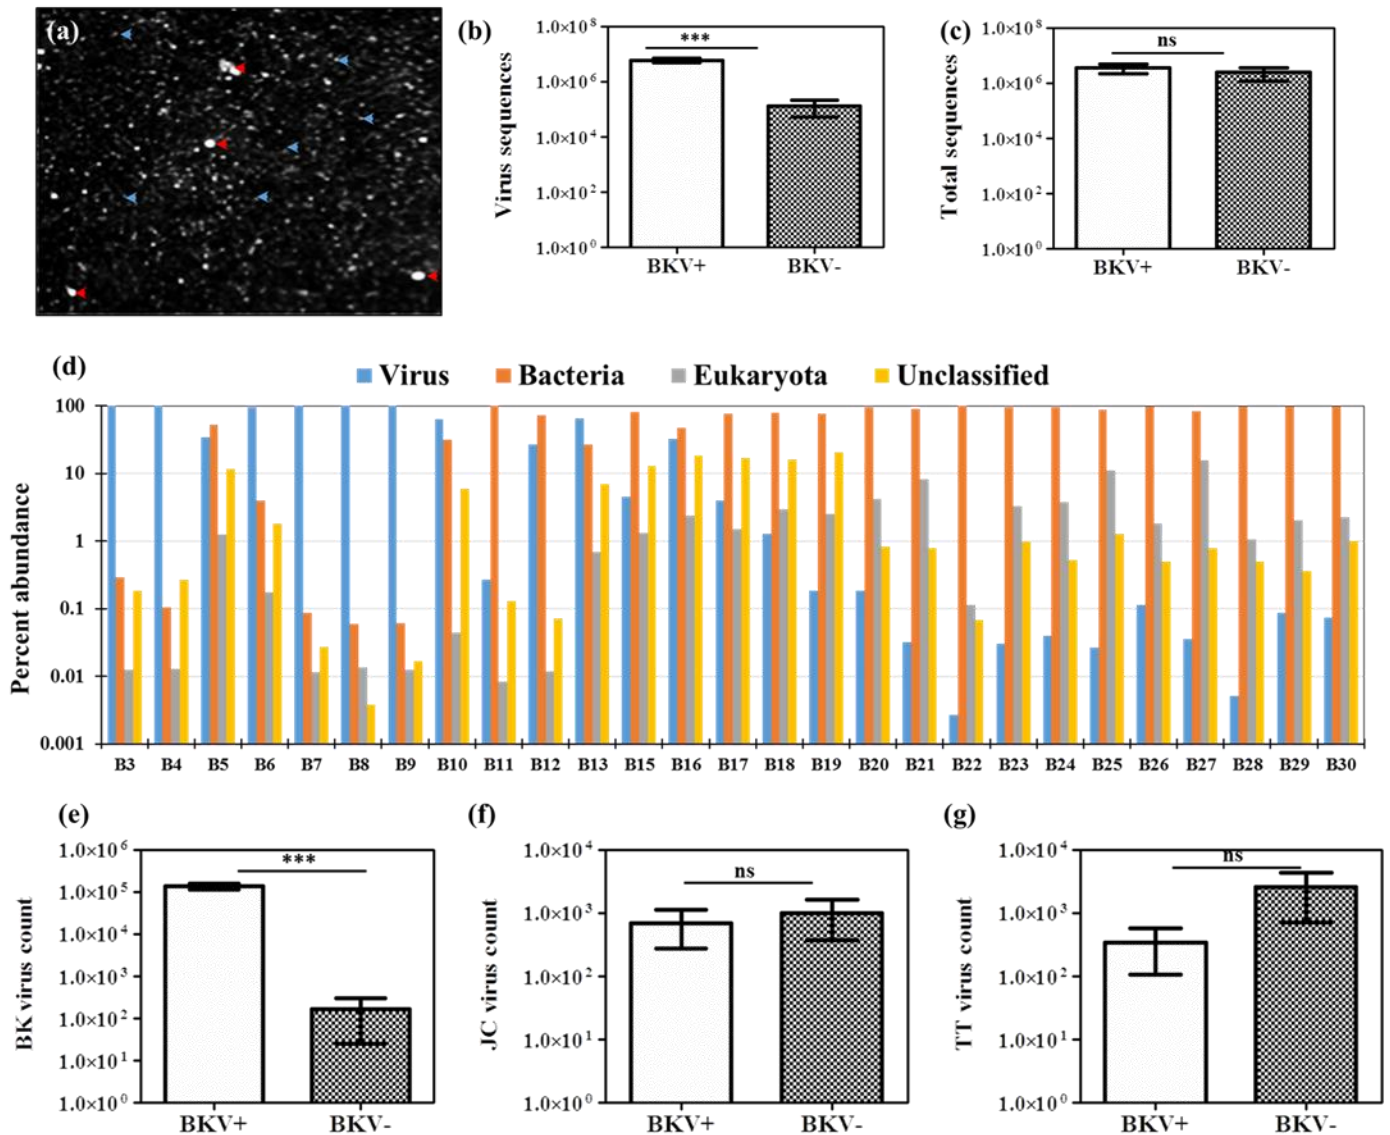

**Supplementary Figure S1. Virus-like particles (VLP) identification and shotgun metagenomics.** (a) VLP was detected in urine of the transplant patients by SyBr Gold staining. The VLP appear as dim pinpoints (denoted by blue arrows) and the microbial cells which are larger and brighter (denoted by red arrows). (b) The sequences were filtered to remove human reads. The total number of virus sequences identified in each group, are significantly different. The difference was computed using Welch *t*-test,  $***p < 0.001$ . (c) Total number of sequences (non-human and non-virus) identified after filtering for virus reads in BKV+ and BKV- samples. No significant (ns) difference was observed in each group. (d) Bar graph representation for distribution of total number of virus, bacteria, eukaryotic and unclassified reads among BKV+ and BKV- samples. (e) BKV, (f) JCV and (g) TTV counts in BKV+ and BKV- groups. BKV was dominant in the BKV+ group and was statistically significant among the groups. The difference was computed using Welch *t*-test,  $***p < 0.001$ . There was no significant (ns) difference among the JCV and TTV virus counts, in both the groups, though virus count for both JC and TTV were slightly higher in BKV- groups.

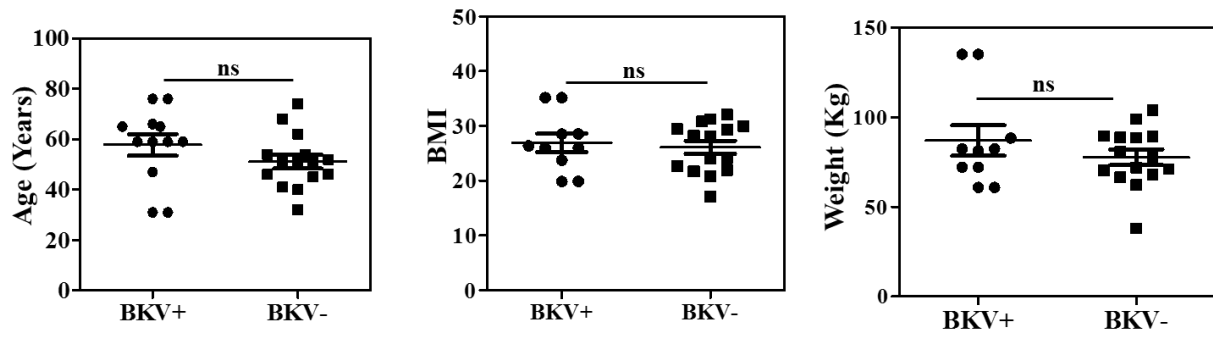

**Supplementary Figure S2. BKV+ and BKV- group patient's demographics.** No correlation was observed between patient's demographics and clinical diagnosis with the status of viremia or viruria in BKV+ and BKV- group. The difference was computed using Welch *t*-test.

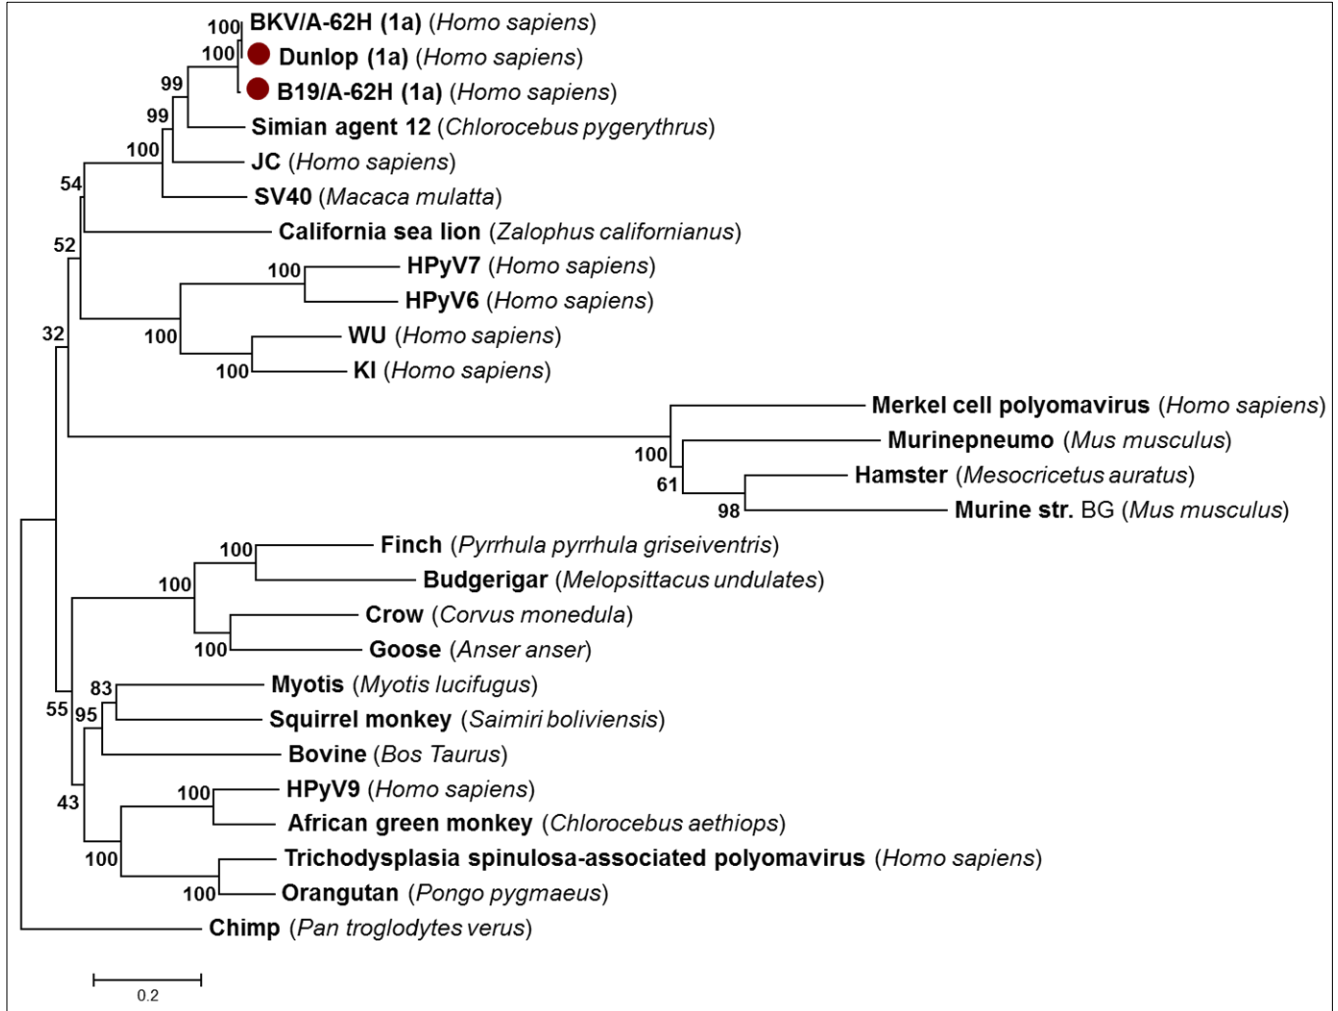

**Supplementary Figure S3. Species specific phylogenetic analysis for BK virus.** Phylogenetic tree analysis is based on the whole genome sequences of the 26 species-specific distinct BKV strains and sequences from this study [e.g. the B19/A-62H (1a) sequence]. Our sequence clustered adjacent to the human BKV Dunlop (1a) reference strain described in this study. The evolutionary history was inferred by using the Maximum Likelihood method based on the Tamura-Nei model. The bootstrap consensus tree inferred from 100 replicates is taken to represent the evolutionary history of the taxa analyzed. The tree is drawn to scale, with branch lengths measured in the number of substitutions per site.

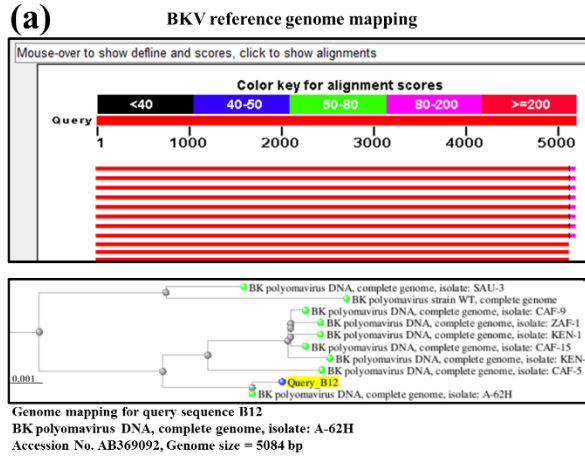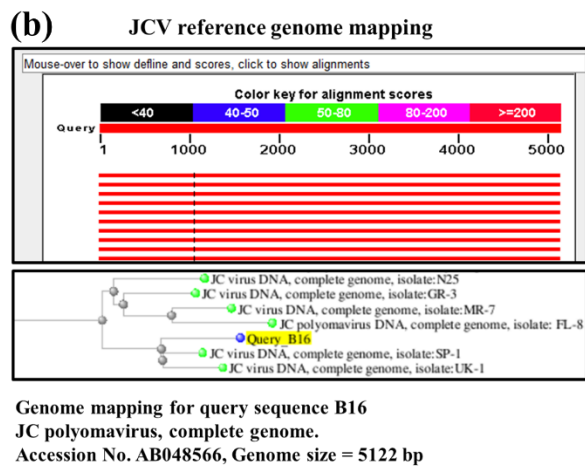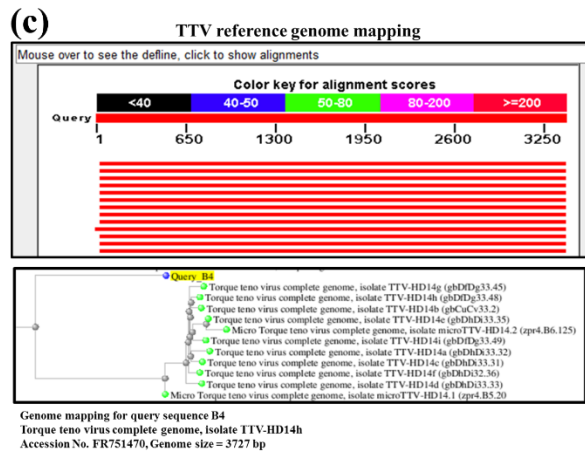

**Supplementary Figure S4. (a) Reference genome mapping for BK virus (a), JC virus and (b), TT virus (c). The query sequences (highlighted in yellow in phylogenetic view) were mapped to reference virus genome sequences to identify virus specific subtype. A blast alignment and phylogenetic view of the mapping is shown for each query sequence against a reference subtype using NCBI webserver.**

|                                                    |                                                               |
|----------------------------------------------------|---------------------------------------------------------------|
| Dunlop (1a)_VP1                                    | MKMAPTKRKGECPGAAPKKPKPEPVQVPKLLIKGGVEVLEVKTVGDAITEVECFLNPEMGD |
| B12/A-62H (1a)_VP1                                 | MKMAPTKRKGECPGAAPKKPKPEPVQVPKLLIKGGVEVLEVKTVGDAITEVECFLNPEMGD |
| B9/RU13 (IV)_VP1                                   | MKMAPTKRKGECPGAAPKKPKPEPVQVPKLLIKGGVEVLEVKTVGDAITEVECFLNPEMGD |
| *****                                              |                                                               |
| Dunlop (1a)_VP1                                    | PDENLRGFSIKLSAENDFSSDSHERKMLPCYSTARIPLPNLNEDLTCGNLLMWEAVTVQT  |
| B12/A-62H (1a)_VP1                                 | PDENLRGFSIKLSAENDFSSDSHERKMLPCYSTARIPLPNLNEDLTCGNLLMWEAVTVQT  |
| B9/RU13 (IV)_VP1                                   | PDNDLRGYSIRLTAETAFLSDSEDRKMLPCYSTARIPLPNLNEDLTCGNLLMWEAVTVKT  |
| **.:***:*.:.***.***.***:*****.*****.*****.***:***: |                                                               |
| Dunlop (1a)_VP1                                    | EVIGITSMLNLHAGSQKVEHGGGKPIQGSNFHFFAVGGPELEMQGVLMNYRKYFDGTI    |
| B12/A-62H (1a)_VP1                                 | EVIGITSMLNLHAGSQKVEHGGGKPIQGSNFHFFAVGGDPLEMQGVLMNYRTKYFDGTI   |
| B9/RU13 (IV)_VP1                                   | EVIGITSMLNLHAGSQKVENGGGKPIQGSNFHFFAVGGDPLEMQGVLMNYRTKYFDGTI   |
| *****:*****.*****.*****.***:***:                   |                                                               |
| Dunlop (1a)_VP1                                    | TPKNPTAQSQVMNTDHKAYLDKNNAYPVECWWPDPNRNENARYFGTFYTGGENVPPVLHVT |
| B12/A-62H (1a)_VP1                                 | TPKNPTAQSQVMNTDHKAYLDKNNAYPVECWWPDPNRNENTRYFGTFYTGGENVPPVLHVT |
| B9/RU13 (IV)_VP1                                   | TPKNPTAQSQVMNTDHKAYLDKNNAYPVECWIIPDPNRNENTRYFGTYTGGENVPPVLHVT |
| *****.:*****.:*****.*****                          |                                                               |
| Dunlop (1a)_VP1                                    | NTATTVLLDEQGVGPLCKADSLYVSAADICGLFTNSSGTQQWRGLRYFKIRLRKRSVK    |
| B12/A-62H (1a)_VP1                                 | NTATTVLLDEQGVGPLCKADSLYVSAADICGLFTNSSGTQQWRGLRYFKIRLRKRSVK    |
| B9/RU13 (IV)_VP1                                   | NTATTVLLDEQGVGPLCKADSLYVSAADICGLFTNSSGTQQWRGLRYFKIRLRKRSVK    |
| *****.:*****                                       |                                                               |
| Dunlop (1a)_VP1                                    | PYPISFLLSDLINRRTQRVDGQPMYGMESQVEEVRVFDGTERLPGDPDMIRYIDKQGLQ   |
| B12/A-62H (1a)_VP1                                 | PYPISFLLSDLINRRTQRVDGQPMYGMESQVEEVRVFDGTERLPGDPDMIRYIDKQGLQ   |
| B9/RU13 (IV)_VP1                                   | PYPISFLLSDLINRRTQRVDGQPMYGMESQVEEVRVFDGTEQLPGDPDMIRYIDRQGLQ   |
| *****.:*****.*****                                 |                                                               |
| Dunlop (1a)_VP1                                    | TKML                                                          |
| B12/A-62H (1a)_VP1                                 | TKML                                                          |
| B9/RU13 (IV)_VP1                                   | TKMV                                                          |
| ***:                                               |                                                               |

**Note**

Sequence 1: Dunlop (1a)\_VP1    364 aa  
Sequence 2: B9/RU13 (IV)\_VP1    364 aa  
Sequence 3: B12/A-62H (1a)\_VP1    364 aa

Alignment Score

Sequences (1:2) Aligned. Score: 93.956  
Sequences (1:3) Aligned. Score: 98.9011  
Sequences (2:3) Aligned. Score: 94.7802

**Supplementary Figure S5.** Multiple sequence alignment using ClustalW for large VP1 protein. Overall protein similarity score was high (more than 93%), however, there were amino acid substitutions and are highlighted in box.

## VP1 protein

|                        | Click to view                    | Rank | Cscore <sup>LB</sup> | PDB Hit               | TM-score | RMSD <sup>a</sup> | IDEN <sup>a</sup> | Cov.  | BS-score | Lig. Name | Download Complex         | Predicted binding site residues |
|------------------------|----------------------------------|------|----------------------|-----------------------|----------|-------------------|-------------------|-------|----------|-----------|--------------------------|---------------------------------|
| <b>BKV Dunlop (1a)</b> | <input checked="" type="radio"/> | 1    | 0.70                 | <a href="#">3bwrC</a> | 0.698    | 1.44              | 0.778             | 0.715 | 1.05     | SIA       | <a href="#">Download</a> | 62,68,69,279                    |
|                        | <input type="radio"/>            | 2    | 0.22                 | <a href="#">3bwrA</a> | 0.697    | 1.44              | 0.772             | 0.715 | 1.04     | Mul.Part  | <a href="#">Download</a> | 69,70,85                        |
| <b>B9/RU13 (IV)</b>    | <input type="radio"/>            | 1    | 0.73                 | <a href="#">3bwrC</a> | 0.696    | 1.44              | 0.797             | 0.713 | 1.58     | Mul.Part  | <a href="#">Download</a> | 68,69,70,71,85,275,277          |
|                        | <input type="radio"/>            | 2    | 0.72                 | <a href="#">3bwrA</a> | 0.695    | 1.44              | 0.794             | 0.713 | 1.44     | SIA       | <a href="#">Download</a> | 63,66,68,69,273,275,277,279     |
| <b>B12/A-62H (1a)</b>  | <input checked="" type="radio"/> | 1    | 0.71                 | <a href="#">3bwrC</a> | 0.698    | 1.46              | 0.782             | 0.715 | 1.20     | SIA       | <a href="#">Download</a> | 63,68,69,273,277,279            |
|                        | <input type="radio"/>            | 2    | 0.22                 | <a href="#">3bwrE</a> | 0.698    | 1.46              | 0.780             | 0.715 | 0.97     | Mul.Part  | <a href="#">Download</a> | 69,70,71,85                     |

**Cscore** is the confidence score of predicted binding site. It ranges in between [0-1]; a higher score indicates a more reliable ligand-binding site prediction. **BS-score** is a measure of local similarity (sequence & structure) between template binding site and predicted binding site in the query structure. A BS-score >1 reflects a significant local match between the predicted and template binding site. **TM-score** is a measure of global structural similarity between query and template protein. **RMSD** the RMSD between residues that are structurally aligned by TM-align. **IDEN** is the percentage sequence identity in the structurally aligned region. **Cov.** represents the coverage of global structural alignment and is equal to the number of structurally aligned residues divided by length of the query protein. The detailed description can be viewed at <http://zhanglab.ccmb.med.umich.edu/COFACTOR/>

**Supplementary Figure S6.** Predicted residue binding sites for VP1 protein in reference Dunlop (1a) strain and B9/RU13 (IV) and B12/A-62H (1a) from two BKV+ patient's described in this study. Predicted binding sites for ligand sialic acid (SIA) are highlighted with circle. The residue binding sites for Dunlop and other BKV sequences were predicted using the COFACTOR algorithm in I-TASSER Suite.

|                                 |                                                               |
|---------------------------------|---------------------------------------------------------------|
| BKV Dunlop (1a)-VP2             | MGAALALLGDLVASVSEAAAATGFSVAEIAAGEAAAAIEVQIASLATVEGITSTSEIAIAA |
| B12/A-62H (1a)-VP2              | MGAALALLGDLVASVSEAAAATGFSVAEIAAGEAAAAIEVQIASLATVEGITSTSEIAIAA |
| B9/RU13 (IV)_VP2                | MGAALALLGDLVASVSEAAAATGFSVAEIAAGEAAAAIEVQIASLATVEGITSTSEIAIAA |
|                                 | *****                                                         |
| BKV Dunlop (1a)-VP2             | IGLTPQTYAVIAGAPGAIAGFAALIQTVSGISSLAQVGYKFFDDWDHKVSTVGLYQQSGM  |
| B12/A-62H (1a)-VP2              | IGLTPQTYAVIAGAPGAIAGFAALIQTVSGISSLAQVGYRFFSDWDHKVSTVGLYQQSGM  |
| B9/RU13 (IV)_VP2                | IGLTPQTYAVIAGAPGAIAGFAALIQTVTGISSLAQVGYRFFSDWDHKVSTVGLYQQSGM  |
|                                 | *****:*****:*.*****                                           |
| BKV Dunlop (1a)-VP2             | ALELFPNDEYYDILFPGVNTFVNNIQYLDPRHWGPSLFATISQALWHVIRDDIPASITSQE |
| B12/A-62H (1a)-VP2              | ALELFPNDEYYDILFPGVNTFVNNIQYLDPRHWGPSLFATISQALWHVIRDDIPASITSQE |
| B9/RU13 (IV)_VP2                | ALELFPNDEYYDILFPGVNTFVNNIQYLDPRHWGPSLFATISQALWHVIRDDIPASITSQE |
|                                 | *****:*****                                                   |
| BKV Dunlop (1a)-VP2             | LQRRTERFFRDSLARFLEETTWIVNAPINFYNYIQYYSDLSPIRPSMVRQVAEREGTR    |
| B12/A-62H (1a)-VP2              | LQRRTERFFRDSLARFLEETTWIVNAPINFYNYIQYYSDLSPIRPSMVRQVAEREGTR    |
| B9/RU13 (IV)_VP2                | LQRRTERFFRDSLARFLEETTWIVNAPVNFYNYIQDYSDLSPIRPSMVRQVAEREGTQ    |
|                                 | *****:*****:***:*****:                                        |
| BKV Dunlop (1a)-VP2             | VHFGHTYSIDDADSIIEVTQRMDLRNQQSVHSGEFIEKTIAPGGANQRTAPQWMLPLLLG  |
| B12/A-62H (1a)-VP2              | VHFGHTYSIDDADSIIEVTQRMDLRNQQSVHSGEFIEKTIAPGGANQRTAPQWMLPLLLG  |
| B9/RU13 (IV)_VP2                | VNFGHTYRIDDADSIIEVTQRMELRNKENVHSGEFIEKTIAPGGANQRTAPQWMLPLLLG  |
|                                 | *:*****:*****:***:..*****                                     |
| BKV Dunlop (1a)-VP2             | LYGTVTPALEAYEDGPNQKRRVSRGSSQKAKGTRASAKTTNKRRSRSSRS            |
| B12/A-62H (1a)-VP2              | LYGTVTPALEAYEDGPNQKRRVSRGSSQKAKGTRASAKTTNKRRSRSSRS            |
| B9/RU13 (IV)_VP2                | LYGTVTPALEAYEDGPNQKRRVSRGSSQKAKGTRASAKTTNKRRSRSSRS            |
|                                 | *****                                                         |
| <b>Note</b>                     |                                                               |
| Sequence 1: BKV Dunlop (1a)-VP2 | 351 aa                                                        |
| Sequence 2: B9/RU13 (IV)_VP2    | 351 aa                                                        |
| Sequence 3: B12/A-62H (1a)-VP2  | 351 aa                                                        |
| <b>Alignment Score:</b>         |                                                               |
| Sequences (1:2) Aligned. Score: | 95.7265                                                       |
| Sequences (1:3) Aligned. Score: | 99.4302                                                       |
| Sequences (2:3) Aligned. Score: | 96.2963                                                       |

**Supplementary Figure S7.** Multiple sequence alignment using ClustalW for VP2 protein. Overall protein similarity score was high (more than 95%). The amino acid substitutions and are highlighted in box.



| Virus subtype            | * | * | * | * | * | * | * | * | * | * | * | * | * | * |   |
|--------------------------|---|---|---|---|---|---|---|---|---|---|---|---|---|---|---|
| 1. DUNLOP (Ia)           | T | A | T | A | A | T | T | A | T | A | T | T | C | A | A |
| 2. A-62H (Ia)            | T | A | T | A | A | T | T | A | T | A | T | T | C | A | A |
| 3. SJH-LG-152 (Ib1)      | T | A | T | A | A | T | T | A | T | A | T | T | C | A | A |
| 4. SJH-LG-306 (Ib1)      | T | A | T | A | A | T | T | A | T | A | T | T | C | A | A |
| 5. SJH-LG-309 (Ib1)      | T | A | T | A | A | T | T | A | T | A | T | T | C | A | A |
| 6. LAB-27 (Ib1)          | T | A | T | A | A | T | T | A | T | A | T | T | C | A | A |
| 7. A-68H (Ib1)           | T | A | T | A | A | T | T | A | T | A | T | T | C | A | A |
| 8. J2B-2 (Ib1)           | T | A | T | A | A | T | T | A | T | A | T | T | C | A | A |
| 9. A-43H (Ib1)           | T | A | T | A | A | T | T | A | T | A | T | T | C | A | A |
| 10. J3B-3 (Ib2)          | T | A | T | A | A | T | T | A | T | A | T | T | C | A | A |
| 11. A-47H (Ib2)          | T | A | T | A | A | T | T | A | T | A | T | T | C | A | A |
| 12. SJH-LG-308 (Ib2)     | T | A | T | A | A | T | T | A | T | A | T | T | C | A | A |
| 13. RU13 (IV)            | T | A | T | A | A | T | T | A | T | A | T | T | C | A | G |
| 14. RU15 (IV)            | T | A | T | A | A | T | T | A | T | A | T | T | C | A | G |
| 15. LAB-33 (IV)          | T | A | T | A | A | T | T | A | T | A | T | T | C | A | G |
| 16. B3/J2B-2 (Ib1)       | T | A | T | A | A | T | T | A | T | A | T | T | C | A | A |
| 17. B4/A-47H (Ib2)       | T | A | T | A | A | T | T | A | T | A | T | T | C | A | A |
| 18. B7/LAB-27 (Ib1)      | T | A | T | A | A | T | T | A | T | A | T | T | C | A | A |
| 19. B8/LAB-27 (Ib1)      | T | A | T | A | A | T | T | A | T | A | T | T | C | A | A |
| 20. B9/RU13 (IV)         | T | A | T | A | A | T | T | A | T | A | T | T | C | A | G |
| 21. B10/A-47H (Ib2)      | C | A | T | A | A | T | T | A | T | A | T | T | C | A | A |
| 22. B11/A-47H (Ib2)      | T | A | T | A | A | T | T | A | T | A | T | T | C | A | A |
| 23. B12/A-62H (Ia)       | T | A | T | A | A | T | T | A | T | A | T | T | C | A | A |
| 24. B16/SJH-LG-309 (Ib1) | T | A | T | A | A | T | T | A | T | A | T | T | C | A | A |
| 25. B18/A-62H (Ia)       | T | A | T | A | A | T | T | A | T | A | T | T | C | A | A |
| 26. B19/J2B-2 (Ib1)      | T | A | T | A | A | T | T | A | T | A | T | T | C | A | A |

↑

Nucleotide position in BK virus genome (Dunlop) 1257.  
VP2 protein region. Note for variation in B10 sample.

| Species/Abbrv            | * | * | * | * |   |
|--------------------------|---|---|---|---|---|
| 1. DUNLOP (Ia)           | Y | N | Y | I | Q |
| 2. A-62H (Ia)            | Y | N | Y | I | Q |
| 3. SJH-LG-152 (Ib1)      | Y | N | Y | I | Q |
| 4. SJH-LG-306 (Ib1)      | Y | N | Y | I | Q |
| 5. SJH-LG-309 (Ib1)      | Y | N | Y | I | Q |
| 6. LAB-27 (Ib1)          | Y | N | Y | I | Q |
| 7. A-68H (Ib1)           | Y | N | Y | I | Q |
| 8. J2B-2 (Ib1)           | Y | N | Y | I | Q |
| 9. A-43H (Ib1)           | Y | N | Y | I | Q |
| 10. J3B-3 (Ib2)          | Y | N | Y | I | Q |
| 11. A-47H (Ib2)          | Y | N | Y | I | Q |
| 12. SJH-LG-308 (Ib2)     | Y | N | Y | I | Q |
| 13. RU13 (IV)            | Y | N | Y | I | Q |
| 14. RU15 (IV)            | Y | N | Y | I | Q |
| 15. LAB-33 (IV)          | Y | N | Y | I | Q |
| 16. B3/J2B-2 (Ib1)       | Y | N | Y | I | Q |
| 17. B4/A-47H (Ib2)       | Y | N | Y | I | Q |
| 18. B7/LAB-27 (Ib1)      | Y | N | Y | I | Q |
| 19. B8/LAB-27 (Ib1)      | Y | N | Y | I | Q |
| 20. B9/RU13 (IV)         | Y | N | Y | I | Q |
| 21. B10/A-47H (Ib2)      | H | N | Y | I | Q |
| 22. B11/A-47H (Ib2)      | Y | N | Y | I | Q |
| 23. B12/A-62H (Ia)       | Y | N | Y | I | Q |
| 24. B16/SJH-LG-309 (Ib1) | Y | N | Y | I | Q |
| 25. B18/A-62H (Ia)       | Y | N | Y | I | Q |
| 26. B19/J2B-2 (Ib1)      | Y | N | Y | I | Q |

↑

Amino acid substitution in VP protein.  
H: Histidine, Y: Tyrosine.

**Supplementary Figure S8.** Multiple sequence alignment using ClustalW for VP2 protein. Multiple sequence alignment revealed a nucleotide substitution at position 1257 in BKV genome B10/A-47H (Ib2), which resulted in an amino acid change from His>Tyr in the protein.

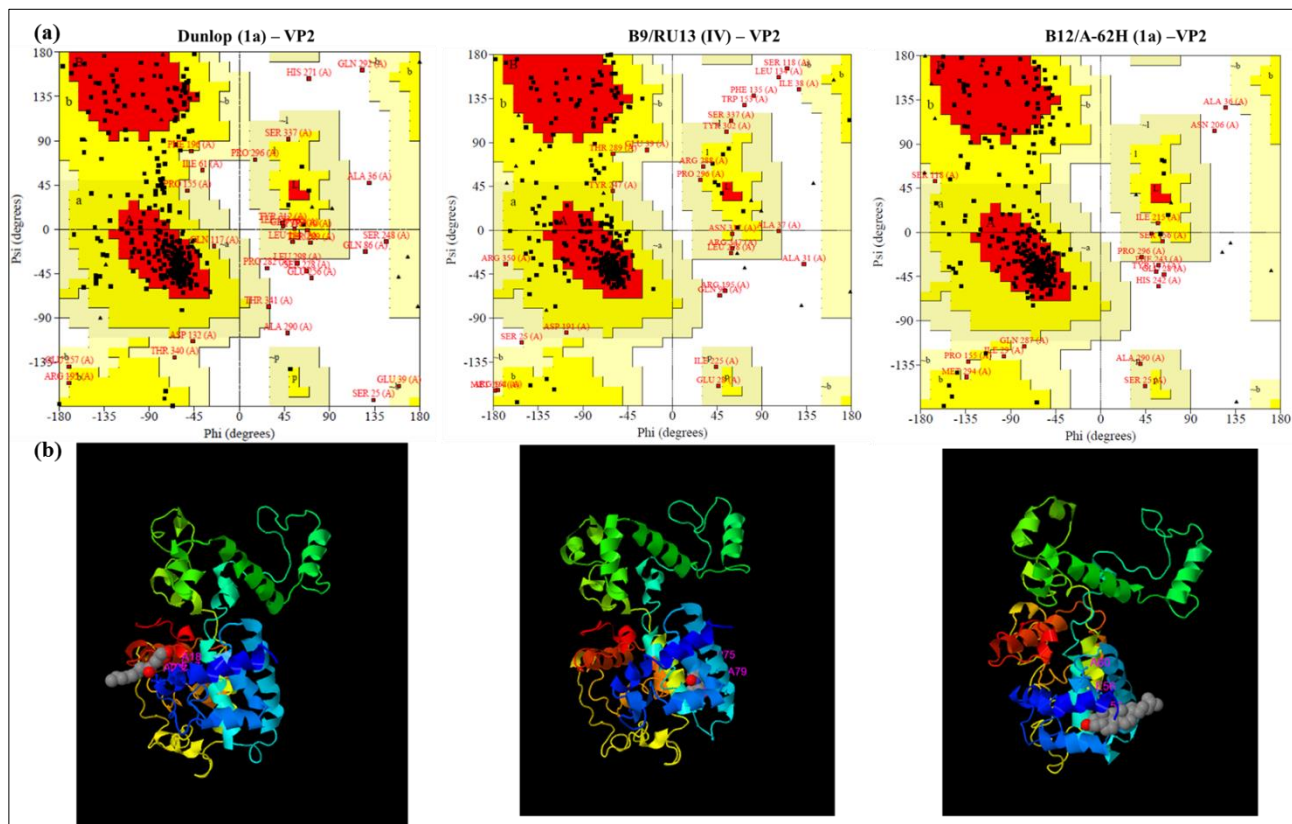

**Supplementary Figure S9. Analysis of VP2 protein of BK virus.** (a) The Ramachandran plot for the phi-psi torsion angles for residues in the VP2 protein of Dunlop (1a) (reference BKV subtype), B9/RU13 (IV) and B12/A-62H (1a) from BKV+ kidney transplant group. The coloring/shading on the plot represents the different regions described in Morris *et al.* (1992): the darkest areas (red) correspond to the "core" regions representing the most favorable combinations of phi-psi values. Over 90% of the residues in the "core" regions predicts a good quality structure model. The different regions on the Ramachandran plots are labelled as follows: A - Core alpha L - Core left-handed alpha a - Allowed alpha l - Allowed left-handed alpha ~a - Generous alpha ~l - Generous left-handed alpha B - Core beta p - Allowed epsilon b - Allowed beta ~p - Generous epsilon ~b - Generous beta.

(b) Predicted 3D structure of the VP2 protein.

## VP2 Protein

| BKV Dunlop (1a) | Click to view         | Rank | Cscore <sup>LB</sup> | PDB Hit               | TM-score | RMSD <sup>a</sup> | IDEN <sup>a</sup> | Cov.  | BS-score | Lig. Name | Download Complex         | Predicted binding site residues |
|-----------------|-----------------------|------|----------------------|-----------------------|----------|-------------------|-------------------|-------|----------|-----------|--------------------------|---------------------------------|
|                 | <input type="radio"/> | 1    | 0.01                 | <a href="#">3oe6A</a> | 0.329    | 4.14              | 0.046             | 0.393 | 0.65     | OLC       | <a href="#">Download</a> | 17,18,21,22                     |

  

| B9/RU13 (IV) | Click to view         | Rank | Cscore <sup>LB</sup> | PDB Hit               | TM-score | RMSD <sup>a</sup> | IDEN <sup>a</sup> | Cov.  | BS-score | Lig. Name | Download Complex         | Predicted binding site residues |
|--------------|-----------------------|------|----------------------|-----------------------|----------|-------------------|-------------------|-------|----------|-----------|--------------------------|---------------------------------|
|              | <input type="radio"/> | 1    | 0.01                 | <a href="#">2q9eB</a> | 0.282    | 3.13              | 0.094             | 0.333 | 0.62     | MTN       | <a href="#">Download</a> | 75,79,91                        |
|              | <input type="radio"/> | 2    | 0.01                 | <a href="#">1xepA</a> | 0.277    | 3.11              | 0.096             | 0.328 | 0.47     | CAQ       | <a href="#">Download</a> | 77,80,81,91                     |
|              | <input type="radio"/> | 3    | 0.01                 | <a href="#">1owyA</a> | 0.278    | 3.09              | 0.096             | 0.328 | 0.47     | PRY       | <a href="#">Download</a> | 75,79,84,88,91,94               |

  

| B12/A-62H (1a) | Click to view         | Rank | Cscore <sup>LB</sup> | PDB Hit               | TM-score | RMSD <sup>a</sup> | IDEN <sup>a</sup> | Cov.  | BS-score | Lig. Name | Download Complex         | Predicted binding site residues |
|----------------|-----------------------|------|----------------------|-----------------------|----------|-------------------|-------------------|-------|----------|-----------|--------------------------|---------------------------------|
|                | <input type="radio"/> | 1    | 0.01                 | <a href="#">3ny9A</a> | 0.389    | 6.16              | 0.079             | 0.610 | 0.40     | CLR       | <a href="#">Download</a> | 52,56,60                        |
|                | <input type="radio"/> | 2    | 0.01                 | <a href="#">2pflA</a> | 0.331    | 6.87              | 0.047             | 0.556 | 0.40     | NA        | <a href="#">Download</a> | 19,22,23,24                     |
|                | <input type="radio"/> | 3    | 0.01                 | <a href="#">3oduB</a> | 0.338    | 5.68              | 0.069             | 0.470 | 0.41     | OLC       | <a href="#">Download</a> | 52,58,62                        |

**Supplementary Figure S10.** Predicted residue binding sites for VP2 protein in reference Dunlop (1a) strain and B9/RU13 (IV) and B12/A-62H (1a) from two BKV+ patient's described in this study. The residue binding sites for Dunlop (1a) and other BKV sequences were predicted using the COFACTOR algorithm in I-TASSER Suite.

|                                                                                                                                                                                                                                                                                         |                                                                                                                                                                                                               |
|-----------------------------------------------------------------------------------------------------------------------------------------------------------------------------------------------------------------------------------------------------------------------------------------|---------------------------------------------------------------------------------------------------------------------------------------------------------------------------------------------------------------|
| BKV Dunlop (1a)-LTA<br>B12/A-62H (1a)-LTA<br>B9/RU13 (IV)_LTA                                                                                                                                                                                                                           | MFASDEEATADSQHSTPPKPKRVEDPKDFPSDLHQFLSQAVFSNRTLACFAVYTTKEKA<br>MFASDEEATADSQHSTPPKPKRVEDPKDFPSDLHQFLSQAVFSNRTLACFAVYTTKEKA<br>MFASDEEATADSQHSTPPKPKRVEDPKDFPSDLHQFLSQAVFSNRTLACFAVYTTKEKA<br>*****            |
| BKV Dunlop (1a)-LTA<br>B12/A-62H (1a)-LTA<br>B9/RU13 (IV)_LTA                                                                                                                                                                                                                           | QILYKKLMEKYSVTFISRHMCAGHNIIFFLTPHRHRVSAINNFCQKLC TFSFLICKGVNK<br>QILYKKLMEKYSVTFISRHMCAGHNIIFFLTPHRHRVSAINNFCQKLC TFSFLICKGVNK<br>QILYKKLMEKYSVTFISRHMCAGHNIIFFLTPHRHRVSAINNFCQKLC TFSFLICKGVNK<br>*****      |
| BKV Dunlop (1a)-LTA<br>B12/A-62H (1a)-LTA<br>B9/RU13 (IV)_LTA                                                                                                                                                                                                                           | EYLLYSALTRDPYHTTEESIQQGLKEHDESPPEEPEETKQVSWKLITEYAVETKCEDVFL<br>EYLLYSALTRDPYHTTEESIQQGLKEHDESPPEEPEETKQVSWKLITEYAVETKCEDVFL<br>EYLLYSALTRDPYHTTEESIQQGLKEHDESPPEEPEETKQVSWKLITEYAVETKCEDVFL<br>*****:*.***** |
| BKV Dunlop (1a)-LTA<br>B12/A-62H (1a)-LTA<br>B9/RU13 (IV)_LTA                                                                                                                                                                                                                           | LGMYLEFQYNVEECKKCKQKDDQPYHFKYHEKHFANAIIFAESKNQKSI CQQAVDTVLAKK<br>LGMYLEFQYNVEECKKCKQKDDQPYHFKYHEKHFANAIIFAESKNQKSI CQQAVDTVLAKK<br>LGMYLEFQYNVEECKKCKQKDDQPYHFKYHEKHFANAIIFAESKNQKSI CQQAVDTVLAKK<br>*****   |
| BKV Dunlop (1a)-LTA<br>B12/A-62H (1a)-LTA<br>B9/RU13 (IV)_LTA                                                                                                                                                                                                                           | RVDTLHMTREEMLTDRFNHILDKMDLIFGAHGNVLEQYMAGVAWLHCLLPKMDSVIFDF<br>RVDTLHMTREEMLTDRFNHILDKMDLIFGAHGNVLEQYMAGVAWLHCLLPKMDSVIFDF<br>RVDTLHMTREEMLTDRFNHILDKMDLIFGAHGNVLEQYMAGVAWLHCLLPKMDSVIFDF<br>*****:*****      |
| BKV Dunlop (1a)-LTA<br>B12/A-62H (1a)-LTA<br>B9/RU13 (IV)_LTA                                                                                                                                                                                                                           | LHCIVFNVPKRRYWLFKGPI DSGKTTLAAGLLDLCGGKALNVNLPMERLTFELGVAIDQY<br>LHCIVFNVPKRRYWLFKGPI DSGKTTLAAGLLDLCGGKALNVNLPMERLTFELGVAIDQY<br>LHCIVFNVPKRRYWLFKGPI DSGKTTLAAGLLDLCGGKALNVNLPMERLTFELGVAIDQY<br>*****      |
| BKV Dunlop (1a)-LTA<br>B12/A-62H (1a)-LTA<br>B9/RU13 (IV)_LTA                                                                                                                                                                                                                           | MVVFEDVKGTGAESKDLPSGHGINNLDLSDYLDGSKVNLEKKHLNKRQTIFPPGLVTM<br>MVVFEDVKGTGAESKDLPSGHGINNLDLSDYLDGSKVNLEKKHLNKRQTIFPPGLVTM<br>MVVFEDVKGTGAESKDLPSGHGINNLDLSDYLDGSKVNLEKKHLNKRQTIFPPGLVTM<br>*****               |
| BKV Dunlop (1a)-LTA<br>B12/A-62H (1a)-LTA<br>B9/RU13 (IV)_LTA                                                                                                                                                                                                                           | NEYVPVKTLQARFVRQIDFRPKIYLRKSLQNSEFLEKRIQSGMTLLLLLIWFRPVADF<br>NEYVPVKTLQARFVRQIDFRPKIYLRKSLQNSEFLEKRIQSGMTLLLLLIWFRPVADF<br>NEYVPVKTLQARFVRQIDFRPKIYLRKSLQNSEFLEKRIQSGMTLLLLLIWFRPVADF<br>*****               |
| BKV Dunlop (1a)-LTA<br>B12/A-62H (1a)-LTA<br>B9/RU13 (IV)_LTA                                                                                                                                                                                                                           | PTDIQSRIVEWKERLDSEISM YTF SRMKYNICMGKCILDTREEDSETEDSGHGSSTESQ<br>PTDIQSRIVEWKERLDSEISM YTF SRMKYNICMGKCILDTREEDSETEDSGHGSSTESQ<br>PTDIQSRIVEWKERLDSEISM YTF SRMKYNICMGKCILDTREEDSETEDSGHGSSTESQ<br>*****      |
| BKV Dunlop (1a)-LTA<br>B12/A-62H (1a)-LTA<br>B9/RU13 (IV)_LTA                                                                                                                                                                                                                           | SQCSSQVSDTSAPAEDSQSOPHSQELHLCKGFQCFKRPKTPPPK<br>SQCSSQVSDTSAPAEDSQSOPHSQELHLCKGFQCFKRPKTPPPK<br>SQCSSQVSDTSAPAEDSQSOPHSQELHLCKGFQCFKRPKTPPPK<br>*****:*****                                                   |
| <p><u>Note</u><br/>Sequence 1: Dunlop (1a) -LTA<br/>Sequence 2: B9/RU13 (IV) -LTA<br/>Sequence 3: B12/A-62H (1a)-LTA</p> <p><u>Alignment Score</u><br/>Sequences (1:2) Aligned. Score: 98.46%<br/>Sequences (1:3) Aligned. Score: 99.65%<br/>Sequences (2:3) Aligned. Score: 98.46%</p> |                                                                                                                                                                                                               |

**Supplementary Figure S11.** Multiple sequence alignment using ClustalW for large T-antigen protein. Overall protein similarity score was high (more than 98%) however, there were amino acid substitutions and are highlighted.

## Large T antigen

|                 | Click to view         | Rank | Cscore <sup>LB</sup> | PDB Hit               | TM-score | RMSD <sup>A</sup> | IDEN <sup>A</sup> | Cov.  | BS-score | Lig. Name | Download Complex         | Predicted binding site residues                                                                                                                             |
|-----------------|-----------------------|------|----------------------|-----------------------|----------|-------------------|-------------------|-------|----------|-----------|--------------------------|-------------------------------------------------------------------------------------------------------------------------------------------------------------|
| BKV Dunlop (1a) | <input type="radio"/> | 1    | 0.51                 | <a href="#">1svmA</a> | 0.615    | 0.63              | 0.773             | 0.619 | 1.84     | ATP       | <a href="#">Download</a> | 289,320,321,322,323,324,325,326,366,421,440,441,442,445,446,449,456                                                                                         |
|                 | <input type="radio"/> | 2    | 0.38                 | <a href="#">2h1f6</a> | 0.615    | 0.79              | 0.774             | 0.621 | 1.84     | PEPTIDE   | <a href="#">Download</a> | 162,163,231,234,235,237,238,246,307,308,309,346,347,350,387,388,389,390,391,395,396,398,400,405,408,409,410,426,427,428,432                                 |
|                 | <input type="radio"/> | 3    | 0.38                 | <a href="#">2h1f3</a> | 0.613    | 0.81              | 0.773             | 0.619 | 1.84     | PEPTIDE   | <a href="#">Download</a> | 176,178,179,181,182,183,202,204,220,221,222,223,225,226,320,325,338,339,341,343,344,345,347,348,351,352,365,366,368,375,376,377,378,404,405,421,423,459,462 |
| B9/RU13 (IV)    | <input type="radio"/> | 1    | 0.51                 | <a href="#">1svmA</a> | 0.611    | 0.97              | 0.776             | 0.619 | 1.87     | ATP       | <a href="#">Download</a> | 289,320,321,322,323,324,325,326,366,421,440,441,442,445,446,449,456                                                                                         |
|                 | <input type="radio"/> | 2    | 0.38                 | <a href="#">2h1f6</a> | 0.610    | 1.11              | 0.777             | 0.621 | 1.81     | PEPTIDE   | <a href="#">Download</a> | 162,163,231,234,235,237,238,246,307,308,309,346,347,350,387,388,389,390,391,395,396,398,400,405,408,409,410,426,427,428,432                                 |
|                 | <input type="radio"/> | 3    | 0.38                 | <a href="#">2h1f3</a> | 0.608    | 1.13              | 0.776             | 0.619 | 1.81     | PEPTIDE   | <a href="#">Download</a> | 176,178,179,181,182,183,202,204,220,221,222,223,225,226,320,325,338,339,341,343,344,345,347,348,351,352,365,366,368,375,376,377,378,404,405,421,423,459,462 |
| B12/A-62H (1a)  | <input type="radio"/> | 1    | 0.66                 | <a href="#">1svmA</a> | 0.613    | 0.84              | 0.773             | 0.619 | 1.87     | ATP       | <a href="#">Download</a> | 289,320,321,322,323,324,325,326,366,421,440,441,442,445,446,449,456                                                                                         |
|                 | <input type="radio"/> | 2    | 0.38                 | <a href="#">2h1f6</a> | 0.613    | 0.98              | 0.774             | 0.621 | 1.83     | PEPTIDE   | <a href="#">Download</a> | 162,163,231,234,235,237,238,246,307,308,309,346,347,350,387,388,389,390,391,395,396,398,400,405,408,409,410,426,427,428,432                                 |
|                 | <input type="radio"/> | 3    | 0.38                 | <a href="#">2h1f3</a> | 0.611    | 0.98              | 0.773             | 0.619 | 1.82     | PEPTIDE   | <a href="#">Download</a> | 176,178,179,181,182,183,202,204,220,221,222,223,225,226,320,325,338,339,341,343,344,345,347,348,351,352,365,366,368,375,376,377,378,404,405,421,423,459,462 |

**Supplementary Figure S12.** Predicted residue binding sites for Large T antigen protein in reference Dunlop (1a) strain B9/RU13 (IV) and B12/A-62H (1a) from two BKV+ patient's described in this study. Predicted binding sites for ligand ATP are highlighted with circle. The residue binding sites for Dunlop (1a) and other BKV sequences were predicted using the COFACTOR algorithm in I-TASSER Suite.

**Supplementary Table S1. Number of virus reads in percent counts.**

| Group       | Sample | Polyomaviridae | Anelloviridae | Herpesviridae | Papillomaviridae | Adenoviridae | Other viruses | Unclassified viruses |
|-------------|--------|----------------|---------------|---------------|------------------|--------------|---------------|----------------------|
| <b>BKV+</b> | B3     | 100.00         | 0.00          | 0.00          | 0.00             | 0.00         | 0.00          | 0.00                 |
|             | B4     | 99.84          | 0.13          | 0.00          | 0.02             | 0.00         | 0.00          | 0.00                 |
|             | B5     | 99.93          | 0.00          | 0.00          | 0.00             | 0.06         | 0.00          | 0.00                 |
|             | B6     | 100.00         | 0.00          | 0.00          | 0.00             | 0.00         | 0.00          | 0.00                 |
|             | B7     | 99.58          | 0.42          | 0.00          | 0.00             | 0.00         | 0.00          | 0.00                 |
|             | B8     | 99.99          | 0.01          | 0.00          | 0.00             | 0.00         | 0.00          | 0.00                 |
|             | B9     | 100.00         | 0.00          | 0.00          | 0.00             | 0.00         | 0.00          | 0.00                 |
|             | B10    | 99.99          | 0.01          | 0.00          | 0.00             | 0.00         | 0.00          | 0.00                 |
|             | B11    | 99.89          | 0.10          | 0.00          | 0.01             | 0.00         | 0.00          | 0.00                 |
|             | B12    | 100.00         | 0.00          | 0.00          | 0.00             | 0.00         | 0.00          | 0.00                 |
|             | B13    | 100.00         | 0.00          | 0.00          | 0.00             | 0.00         | 0.00          | 0.00                 |
|             | B15    | 99.97          | 0.02          | 0.01          | 0.00             | 0.00         | 0.00          | 0.00                 |
| <b>BKV-</b> | B16    | 8.44           | 91.34         | 0.00          | 0.00             | 0.00         | 0.00          | 0.21                 |
|             | B17    | 61.07          | 38.86         | 0.01          | 0.00             | 0.00         | 0.00          | 0.06                 |
|             | B18    | 0.78           | 99.18         | 0.03          | 0.00             | 0.00         | 0.01          | 0.00                 |
|             | B19    | 13.70          | 80.00         | 0.12          | 0.00             | 6.11         | 0.05          | 0.01                 |
|             | B20    | 1.69           | 1.69          | 0.00          | 11.86            | 0.00         | 3.39          | 81.36                |
|             | B21    | 0.00           | 0.00          | 0.00          | 25.00            | 25.00        | 25.00         | 25.00                |
|             | B22    | 66.67          | 0.00          | 0.00          | 0.00             | 0.00         | 33.33         | 0.00                 |
|             | B23    | 18.18          | 0.00          | 0.00          | 36.36            | 18.18        | 18.18         | 9.09                 |
|             | B24    | 11.11          | 0.00          | 0.00          | 33.33            | 33.33        | 11.11         | 11.11                |
|             | B25    | 0.00           | 37.50         | 0.00          | 0.00             | 0.00         | 37.50         | 25.00                |
|             | B26    | 0.00           | 91.78         | 0.00          | 5.48             | 1.37         | 1.37          | 0.00                 |
|             | B27    | 6.67           | 13.33         | 0.00          | 26.67            | 20.00        | 0.00          | 33.33                |
|             | B28    | 0.00           | 0.00          | 0.00          | 0.00             | 50.00        | 0.00          | 50.00                |
|             | B29    | 0.00           | 0.00          | 0.00          | 3.85             | 80.77        | 11.54         | 3.85                 |
|             | B30    | 0.00           | 0.00          | 0.00          | 64.29            | 21.43        | 7.14          | 7.14                 |

The relative abundance values are calculated from the total read counts for each virus.

**Supplementary Table S2a. BKV virus count and subtype distribution in BKV+ kidney transplant group.**

| Sample     | Reference               | Subtype        | Genome Size (bp) | Virus count <sup>#</sup> |
|------------|-------------------------|----------------|------------------|--------------------------|
| B3 (BKV+)  | BKV J2B-2               | Ib1            | 5,141            | 192,450                  |
| B4 (BKV+)  | BKV A-47H               | Ib2            | 5,141            | 193,513                  |
| B5 (BKV+)  | BKV SJH-LG-309          | Ib1            | 5,134            | 28,544                   |
|            | BKV J2B-2               | Ib1            | 5,141            | 27,932                   |
|            | BKV SJH-LG-304          | Ib1            | 5,141            | 14,011                   |
|            | BKV VP1M26              | I              | 5,141*           | 12,628                   |
|            | BKV WT                  | Ia             | 5,216            | 12,424                   |
|            | BKV SJH-LG-306          | Ib1            | 5,141            | 11,973                   |
|            | BKV VP1M27              | I              | 5,141*           | 10,583                   |
|            | Human Papovavirus BK    | -              | 5,153            | 3,836                    |
|            | BKV ANY-63              | Ic             | 5,142            | 2,612                    |
|            | BKV SUSH/SGPGI          | -              | 5,141*           | 2,064                    |
|            | BKV HI-u8               | Ib1            | 5,132            | 874                      |
| B6 (BKV+)  | BKV SJH-LG-309          | Ib1            | 5,134            | 79,134                   |
|            | BKV SJH-LG-306          | Ib1            | 5,141            | 46,619                   |
|            | BKV J2B-2               | Ib1            | 5,141            | 39,167                   |
|            | BKV WT                  | Ia             | 5,216            | 15,444                   |
|            | BKV Tun-36              | -              | 5,141*           | 7,980                    |
|            | BKV_ISR_E_V7.1          | -              | 5,141*           | 815                      |
|            | BKV VP1M26              | I              | 5,141*           | 71                       |
| B7 (BKV+)  | BKV LAB27               | Ib1            | 5,141            | 190,748                  |
| B8 (BKV+)  | BKV LAB27               | Ib1            | 5,141            | 192,440                  |
| B9 (BKV+)  | BKV RU13                | IV             | 5,146            | 204,955                  |
|            | BKV SJH-LG-309          | Ib1            | 5,134            | 725                      |
| B10 (BKV+) | BKV A-47H               | Ib2            | 5,141            | 112,576                  |
| B11 (BKV+) | BKV RU13                | IV             | 5,146            | 1                        |
|            | BKV A-47H               | Ib2            | 5,141            | 494                      |
| B12 (BKV+) | BKV A-62H               | Ia             | 5,141            | 51,398                   |
| B13 (BKV+) | BKV A-62H               | Ia             | 5,141            | 100,447                  |
|            | BKV WT                  | Ia             | 5,216            | 20,110                   |
|            | BKV for LT              | -              | 4,963            | 14,247                   |
|            | BKV-D                   | Ia             | 5,172            | 8,229                    |
|            | BKV VP1M23              | I              | 5,141*           | 3,923                    |
|            | BKV CAF-2               | -              | 5,141*           | 3,130                    |
|            | BKV VP1M27              | I              | 5,141*           | 98                       |
|            | BKV isolate patient 107 | -              | 5,141*           | 17                       |
|            |                         | BKV SJH-LG-308 | Ib2              | 5,141                    |
| B15 (BKV+) | BKV A-62H               | Ia             | 5,141            | 4,232                    |
|            | BKV WT                  | Ia             | 5,216            | 2,233                    |

<sup>#</sup>Virus count: Reads per kb per million reads (RPKM) =  $(10^9 * C)/(N * L)$ , where C = Number of reads mapped to BK virus, N = Total reads in the sample used for analysis, L = Genome length in base-pairs for BK virus (from NCBI Genome).

\*Predicted average genome size. - Subtype not known.

**Supplementary Table S2b. BKV virus count and subtype distribution in BKV- kidney transplant group.**

| Sample     | Reference      | Subtype | Genome Size (bp) | Virus count <sup>#</sup> |
|------------|----------------|---------|------------------|--------------------------|
| B16 (BKV-) | BKV A-62H      | Ia      | 5141             | 31                       |
|            | BKV ANY-63     | Ic      | 5142             | 11                       |
|            | BKV BKV-D      | Ia      | 5172             | 26                       |
|            | BKV SJH-LG-168 | Ib1     | 5141             | 27                       |
|            | BKV SJH-LG-306 | Ib1     | 5141             | 3                        |
|            | BKV SJH-LG-309 | Ib1     | 5134             | 15                       |
| B17 (BKV-) | BKV A-62H      | Ia      | 5141             | 1453                     |
|            | BKV SJH-LG-168 | Ib1     | 5141             | 11                       |
|            | BKV SJH-LG-309 | Ib1     | 5134             | 176                      |
|            | BKV J2B-9      | Ib2     | 5141             | 50                       |
| B18 (BKV-) | BKV A-62H      | Ia      | 5141             | 41                       |
|            | BKV J2B-2      | Ib1     | 5141             | 2                        |
|            | BKV VNM-9      | Ib1     | 5141             | 16                       |
| B19 (BKV-) | BKV A-62H      | Ia      | 5141             | 3                        |
|            | BKV J2B-2      | Ib1     | 5141             | 110                      |

<sup>#</sup>Virus count: Reads per kb per million reads (RPKM) =  $(10^9 * C)/(N * L)$ , where C = Number of reads mapped to BK virus, N = Total reads in the sample used for analysis, L = Genome length in base-pairs for BK virus (from NCBI Genome).



**Supplementary Table S3. JC virus count and subtype distribution in BKV+ and BKV- samples.**

| Sample     | Reference       | Subtype  | Genome Size (bp) | Virus count <sup>#</sup> |
|------------|-----------------|----------|------------------|--------------------------|
| B5 (BKV+)  | JCV BJ-1        | 7B-1     | 5121*            | 0.5                      |
|            | JCV ZJ-1        | 7B-1     | 5120             | 3.4                      |
| B6 (BKV+)  | JCV BJ-1        | 7B-1     | 5121*            | 0.3                      |
| B13 (BKV+) | JCV OH-1        | -        | 5147             | 1074                     |
|            | JCV ML-2        | -        | 5116             | 3.8                      |
|            | JCV ZJ-1        | 7B-1     | 5120             | 1.2                      |
|            | JCV BJ-1        | 7B-1     | 5121*            | 0.3                      |
|            | JCV JAL         | 7A; SC-f | 5121*            | 0.2                      |
| B15 (BKV+) | JCV ML-2        | -        | 5116             | 2588                     |
|            | JCV ZJ-1        | 7B-1     | 5120             | 4576                     |
|            | JCV/5386/KW     | -        | 5121*            | 2.8                      |
|            | JCV SL-15       | -        | 5119             | 1.6                      |
| B16 (BKV-) | JCV SP-1        | 1B       | 5122             | 8251                     |
| B17 (BKV-) | JCV SP-1        | 1B       | 5122             | 8246                     |
|            | JCV CPN1        | -        | 5121*            | 790                      |
|            | JCV 173FLC-05   | -        | 5121*            | 312                      |
|            | JCV VSO-2       | -        | 5121             | 304                      |
|            | JCV 603         | -        | 5121*            | 59                       |
| B18 (BKV-) | JCV OH-1        | -        | 5147             | 0.3                      |
|            | JCV 9           | -        | 5121*            | 0.3                      |
|            | JCV ZJ-1        | 7B-1     | 5120             | 0.3                      |
|            | JCV176FLC-10    | -        | 5121*            | 0.2                      |
|            | JCV 406         | -        | 5121*            | 0.2                      |
| B19 (BKV-) | JCV ZJ-1        | 7B-1     | 5120             | 2.2                      |
|            | JCV RJ/2005-07  | -        | 5121*            | 1.5                      |
|            | JCV UK-1        | 1B       | 5122             | 1.4                      |
|            | JCV 183FLC-01   | -        | 5121*            | 1.0                      |
|            | JCV MC-8        | -        | 5121             | 0.9                      |
|            | JCV 149URNFL-13 | -        | 5121*            | 0.8                      |
|            | JCV FL-8        | 1        | 5121             | 0.5                      |

<sup>#</sup>Virus count: Reads per kb per million reads (RPKM) =  $(10^9 * C)/(N * L)$ , where C = Number of reads mapped to JC virus, N = Total reads in the sample used for analysis, L = Genome length in base-pairs for JC virus (from NCBI Genome).

\*Predicted average genome size. – Subtype not known.

**Supplementary Table S4a. TT virus count and subtype distribution in BKV+ kidney transplant group.**

| Sample     | Reference                | Genome Size (bp) | Virus count <sup>#</sup> |
|------------|--------------------------|------------------|--------------------------|
| B4 (BKV+)  | TTV HD14h                | 3,725            | 275.1                    |
|            | TTV sle2552              | 1,509            | 179.5                    |
|            | TTVyon-LC011             | 3,675            | 15.6                     |
|            | TTV genotype 23          | 3,792            | 13.5                     |
|            | TTV 3CR11                | 3,725*           | 10.5                     |
|            | TTV SIA109               | 3,260            | 5.3                      |
| B5 (BKV+)  | TTV Polish isolate P/1C1 | 3,756            | 11.3                     |
|            | TTV isolate L02          | 3,206            | 0.4                      |
| B6 (BKV+)  | TTV ViPi04               | 3,774            | 1.9                      |
|            | TTV HD22 (rheu112)       | 3,816            | 0.9                      |
|            | TTV HD11 sle2037         | 3,814            | 0.6                      |
|            | TTV CT25F                | 3,726            | 0.3                      |
| B7 (BKV+)  | TTV 21 TCHN-B            | 3,153            | 1464.4                   |
|            | TTV 5 TCHN-C1            | 3,229            | 416.0                    |
|            | TTV CT25F                | 3,726            | 340.3                    |
|            | TTV L018                 | 3,725*           | 210.8                    |
|            | TTV genotype 23          | 3,792            | 94.9                     |
|            | TTV 20 SAa-10            | 3,234            | 87.8                     |
|            | TTV 29 TTVyon-KC009      | 3,676            | 46.4                     |
|            | TTV JA10                 | 3,539            | 41.3                     |
|            | TTV TYM9-cDNA d-1        | 2,297            | 40.6                     |
|            | TTV JT19F                | 3,676            | 25.2                     |
|            | TTV 3 HEL32              | 3,748            | 20.7                     |
|            | TTV 19 SANBAN            | 3,808            | 11.0                     |
|            | TTV 3CR11                | 3,725*           | 7.6                      |
|            | TTV mini LIL-y1          | 2,887            | 3.4                      |
|            | TTV mini 1 TLMV-CBD279   | 2,856            | 2.8                      |
|            | TTV mini TLMV-CLC205     | 2,841            | 2.8                      |
| B8 (BKV+)  | TTV SAF-09               | 3,155            | 16.0                     |
|            | TTV L018                 | 3,725*           | 12.6                     |
|            | TTV 5 TCHN-C1            | 3,229            | 6.2                      |
|            | TTV 3 HEL32              | 3,748            | 5.6                      |
|            | TTV mini LIL-y1          | 2,887            | 1.1                      |
| B10 (BKV+) | TTV midi Pt-TTMDV225-2   | 3,269            | 581.2                    |
|            | TTV midi MDJN91          | 3,183            | 19.6                     |
| B13 (BKV+) | TTV midi Pt-TTMDV225-2   | 3,269            | 62.5                     |
|            | TTV TUPB                 | 3,817            | 12.3                     |
|            | TTV midi MDJN91          | 3,183            | 2.0                      |
|            | TTV ViPi04               | 3,774            | 1.8                      |
|            | TTV CT25F                | 3,726            | 1.2                      |
| B15 (BKV+) | TTV TUPB                 | 3,817            | 32.4                     |
|            | TTV KC005/2-21E          | 3,725*           | 0.4                      |

<sup>#</sup>Virus count: Reads per kb per million reads (RPKM) =  $(10^9 * C)/(N * L)$ , where C = Number of reads mapped to TT virus, N = Total reads in the sample used for analysis, L = Genome length in base-pairs for TTV (from NCBI Genome). \*Predicted average genome size.

**Supplementary Table S4b. TT virus count and subtype distribution in BKV- kidney transplant group.**

| Sample          | Reference            | Genome Size (bp) | Virus count <sup>#</sup> |
|-----------------|----------------------|------------------|--------------------------|
| B16 (BKV-)      | TTV HD14h            | 3727             | 6795.2                   |
|                 | TTV tth4             | 3772             | 6476.5                   |
|                 | TTV tth26            | 3756             | 2628.5                   |
|                 | TTV tth21            | 3741             | 2516.0                   |
|                 | TTV-HD20b            | 3834             | 2496.4                   |
|                 | TTV-HD17             | 3756             | 2436.0                   |
|                 | TTV ZC-1998-2        | 3725             | 796.7                    |
|                 | TTV midi MDJHem3-2   | 3197             | 705.3                    |
|                 | TTV midi MDJN1       | 3223             | 298.3                    |
|                 | TTV midi 1 MD1-073   | 3242             | 284.8                    |
|                 | TTV-HD20d            | 3880             | 254.9                    |
|                 | TTV midi Pt-TTMDV210 | 3257             | 254.3                    |
|                 | TTV midi L67NA1      | 3725             | 250.0                    |
|                 | TTV 27 CT23F         | 3729             | 123.6                    |
|                 | TTV midi MDJN97      | 3223             | 121.9                    |
|                 | TTV-HD20f            | 3881             | 109.7                    |
|                 | TTV midi L83NA1      | 3725             | 84.6                     |
|                 | TTV JT19F            | 3676             | 45.2                     |
|                 | TTV midi MDJN51      | 3187             | 20.8                     |
|                 | TTV ViPi08           | 3479             | 7.5                      |
|                 | TTV CT30F            | 3570             | 3.9                      |
|                 | TTV CT25F            | 3726             | 3.2                      |
|                 | TTV mini 5 TGP96     | 2908             | 3.2                      |
|                 | TTV CT43-14          | 3725             | 1.8                      |
| TTV JT41F       | 3727                 | 1.6              |                          |
| TTV midi L92NA1 | 3725                 | 0.6              |                          |
| B17 (BKV-)      | TTV CT25F            | 3726             | 4167.6                   |
|                 | TTV 3 HEL32          | 3748             | 1343.0                   |
|                 | TTV midi MDJHem5     | 3205             | 1436.9                   |
|                 | TTV tth29            | 3700             | 1101.0                   |
|                 | TTV mini 5 TGP96     | 2908             | 867.6                    |
|                 | TTV 16 TUS01         | 3818             | 493.7                    |
|                 | TTV midi MDJN69      | 3230             | 110.0                    |
|                 | TTV tth21            | 3741             | 8.8                      |
|                 | TTV HD20a            | 3878             | 5.5                      |
|                 | TTV HD20f            | 3881             | 1.2                      |
|                 | TTV HD14i            | 3726             | 1.1                      |
|                 | TTV CT25-05          | 3725             | 1.0                      |
|                 | TTV HD14d            | 3728             | 0.8                      |
|                 | TTV-HD14h            | 3727             | 0.8                      |

|            |                          |      |       |
|------------|--------------------------|------|-------|
|            |                          |      |       |
| B18 (BKV-) | TTV HD22                 | 3816 | 402.6 |
|            | TTV ViPi08               | 3479 | 343.0 |
|            | TTV JT41F                | 3727 | 69.2  |
|            | TTV sle2550              | 3725 | 21.9  |
|            | TTV KC009/2-3G           | 3725 | 13.0  |
|            | TTV ViPi04               | 3774 | 6.6   |
|            | TTV sle2552              | 1509 | 1.7   |
|            | TTV SIA109               | 3260 | 0.3   |
|            | TTV HD24f                | 3758 | 0.3   |
|            | TTV HD13c gsB21.51       | 3749 | 0.1   |
|            |                          |      |       |
| B19 (BKV-) | TTV SIA109               | 3260 | 582.2 |
|            | TTV 24 SAa-01            | 3246 | 226.0 |
|            | TTV CT25F                | 3726 | 157.3 |
|            | TTV HD15d                | 3700 | 145.2 |
|            | TTV Polish isolate P/IC1 | 3756 | 21.6  |
|            | TTV KC009/2-3G           | 3725 | 8.3   |
|            | TTV HD13c gsB21.51       | 3749 | 2.8   |
|            | TTV L02                  | 3206 | 1.5   |
|            | TTV 3CR08                | 3725 | 1.5   |
|            | TTV HD13a gsB20.33       | 3749 | 1.2   |
|            | TTV T3PB                 | 3838 | 0.9   |
|            | TTV HD20f                | 3881 | 0.2   |

#Virus count: Reads per kb per million reads (RPKM) =  $(10^9 * C)/(N * L)$ , where C = Number of reads mapped to TT virus, N = Total reads in the sample used for analysis, L = Genome length in base-pairs for TTV. \* Predicted average genome size.

**Supplementary Table S5. Number of virus subtypes in BKV+ and BKV- groups.**

| <b>Sample name</b>   | <b>BKV</b> | <b>JCV</b> | <b>TTV</b> | <i>Sample average</i> |
|----------------------|------------|------------|------------|-----------------------|
| B3                   | 1.0        | 0.0        | 0.0        | 0.3                   |
| B4                   | 1.0        | 0.0        | 6.0        | 2.3                   |
| B5                   | 11.0       | 2.0        | 2.0        | 5.0                   |
| B6                   | 7.0        | 1.0        | 4.0        | 4.0                   |
| B7                   | 1.0        | 0.0        | 17.0       | 6.0                   |
| B8                   | 1.0        | 0.0        | 5.0        | 2.0                   |
| B9                   | 2.0        | 0.0        | 0.0        | 0.7                   |
| B10                  | 1.0        | 0.0        | 2.0        | 1.0                   |
| B11                  | 2.0        | 0.0        | 0.0        | 0.7                   |
| B12                  | 1.0        | 0.0        | 0.0        | 0.3                   |
| B13                  | 9.0        | 5.0        | 5.0        | 6.3                   |
| B15                  | 2.0        | 4.0        | 2.0        | 2.7                   |
| <i>Group Average</i> | 3.3        | 1.0        | 3.6        | 2.6                   |
|                      |            |            |            |                       |
| B16                  | 6.0        | 1.0        | 26.0       | 11.0                  |
| B17                  | 4.0        | 5.0        | 14.0       | 7.7                   |
| B18                  | 3.0        | 5.0        | 10.0       | 6.0                   |
| B19                  | 2.0        | 7.0        | 11.0       | 6.7                   |
| B20                  | 1.0        | 0.0        | 1.0        | 0.7                   |
| B21                  | 0.0        | 0.0        | 0.0        | 0.0                   |
| B22                  | 0.0        | 1.0        | 0.0        | 0.3                   |
| B23                  | 1.0        | 0.0        | 0.0        | 0.3                   |
| B24                  | 1.0        | 0.0        | 0.0        | 0.3                   |
| B25                  | 0.0        | 0.0        | 1.0        | 0.3                   |
| B26                  | 0.0        | 0.0        | 1.0        | 0.3                   |
| B27                  | 1.0        | 0.0        | 1.0        | 0.7                   |
| B28                  | 0.0        | 0.0        | 0.0        | 0.0                   |
| B29                  | 0.0        | 0.0        | 0.0        | 0.0                   |
| B30                  | 0.0        | 0.0        | 0.0        | 0.0                   |
| <i>Group Average</i> | 1.3        | 1.3        | 4.3        | 2.3                   |

**Supplementary Table S6. RM plot statistics of VP1 protein for reference DUNLOP and two BKV+ samples from BKV+ kidney transplant group.**

| <b>RM Plot Statistics</b>                            | <b>DUNLOP</b>   | <b>B9</b>   | <b>B12</b>  |
|------------------------------------------------------|-----------------|-------------|-------------|
|                                                      | <b>Residues</b> |             |             |
| Residues in most favored regions [A,B,L]             | 211 (70.3%)     | 204 (68.0%) | 211 (70.3%) |
| Residues in additional allowed regions [a,b,l,p]     | 80 (26.7%)      | 82 (27.3%)  | 76 (25.3%)  |
| Residues in generously allowed regions [~a,~b,~l,~p] | 8 (2.7%)        | 11 (3.7%)   | 9 (3.0%)    |
| Residues in disallowed regions                       | 1 (0.3%)        | 3 (1.0%)    | 4 (1.3%)    |
| Number of non-glycine and non-proline residues       | 300 (100%)      | 300 (100%)  | 300 (100%)  |
| Number of end-residues (excl. Gly and Pro)           | 2               | 2           | 2           |
| Number of glycine residues (shown as triangles)      | 31              | 31          | 31          |
| Number of proline residues                           | 28              | 29          | 28          |
| Total number of residues                             | 361             | 362         | 361         |

**Supplementary Table S7. Nucleotide substitution observed in VP2 protein in sample B10 (BKV+ sample) compared to reference BKV genome.**

| Reference strain/ Sample | Subtype /Subgroup | Dunlop position | Amino acid | Nucleotide substitutions | Translated protein code |
|--------------------------|-------------------|-----------------|------------|--------------------------|-------------------------|
| DUNLOP                   | Ia                | 1257            | 423        | <u>T</u> AT              | Y (Tyr)                 |
| A-47H                    | Ib2               |                 |            | TAT                      | Y (Tyr)                 |
| B10                      | Ib2               |                 |            | <u>C</u> AT              | H (His)                 |
|                          |                   |                 |            |                          |                         |
| DUNLOP                   | Ia                | 2670            | 895        | ACA                      | T (Thr)                 |
| A-47H                    | Ib2               |                 |            | <u>T</u> GA              | *                       |
| B10                      | Ib2               |                 |            | <u>T</u> AA              | *                       |

\*Stop codon. Nucleotide substitutions are indicated in bold and underline.

**Supplementary Table S8. RM plot statistics of VP2 protein for reference DUNLOP and two BKV+ samples from BKV+ kidney transplant group.**

| <b>RM Plot Statistics</b>                                                        | <b>DUNLOP</b>   | <b>B9</b>   | <b>B12</b>  |
|----------------------------------------------------------------------------------|-----------------|-------------|-------------|
|                                                                                  | <b>Residues</b> |             |             |
| Residues in most favored regions [A,B,L]                                         | 206 (66.7%)     | 207 (67.0%) | 221 (71.5%) |
| Residues in additional allowed regions [a,b,l,p]                                 | 77 (24.9%)      | 77 (24.9%)  | 74 (23.9%)  |
| Residues in generously allowed regions [ $\sim$ a, $\sim$ b, $\sim$ l, $\sim$ p] | 16 (5.2%)       | 16 (5.2%)   | 8 (2.6%)    |
| Residues in disallowed regions                                                   | 10 (3.2%)       | 9 (2.9%)    | 6 (1.9%)    |
| Number of non-glycine and non-proline residues                                   | 309 (100%)      | 309 (100%)  | 309 (100%)  |
|                                                                                  |                 |             |             |
| Number of end-residues (excl. Gly and Pro)                                       | 2               | 2           | 2           |
| Number of glycine residues (shown as triangles)                                  | 25              | 25          | 25          |
| Number of proline residues                                                       | 15              | 15          | 15          |
| Total number of residues                                                         | 351             | 585         | 585         |



**Supplementary Table S9. RM plot statistics of Large T antigen protein for reference DUNLOP and two BKV+ samples from BKV+ kidney transplant group.**

| <b>RM Plot Statistics</b>                                                        | <b>DUNLOP</b>   | <b>B9</b>   | <b>B12</b>  |
|----------------------------------------------------------------------------------|-----------------|-------------|-------------|
|                                                                                  | <b>Residues</b> |             |             |
| Residues in most favored regions [A,B,L]                                         | 393 (73.9%)     | 381 (71.6%) | 397 (74.6%) |
| Residues in additional allowed regions [a,b,l,p]                                 | 104 (19.5%)     | 105 (19.7%) | 102 (19.2%) |
| Residues in generously allowed regions [ $\sim$ a, $\sim$ b, $\sim$ l, $\sim$ p] | 20 (3.8%)       | 28 (5.3%)   | 21 (3.9%)   |
| Residues in disallowed regions                                                   | 15 (2.8%)       | 18 (3.4%)   | 12 (2.3%)   |
| Number of non-glycine and non-proline residues                                   | 532 (100%)      | 532 (100%)  | 532 (100%)  |
|                                                                                  |                 |             |             |
| Number of end-residues (excl. Gly and Pro)                                       | 2               | 2           | 2           |
| Number of glycine residues (shown as triangles)                                  | 25              | 25          | 25          |
| Number of proline residues                                                       | 26              | 26          | 26          |
| Total number of residues                                                         | 585             | 585         | 585         |

**Supplementary Table S10. Virus identified in BKV+ and BKV- group.**

| Virus                         | BKV+  |      |      |       |      |       |       |       |      |       |      |      | BKV - |      |      |      |      |      |      |      |      |      |      |      |      |      |      |
|-------------------------------|-------|------|------|-------|------|-------|-------|-------|------|-------|------|------|-------|------|------|------|------|------|------|------|------|------|------|------|------|------|------|
|                               | B3    | B4   | B5   | B6    | B7   | B8    | B9    | B10   | B11  | B12   | B13  | B15  | B16   | B17  | B18  | B19  | B20  | B21  | B22  | B23  | B24  | B25  | B26  | B27  | B28  | B29  | B30  |
| Mardivirus                    | 0.0   | 0.0  | 0.0  | 0.0   | 0.0  | 0.0   | 0.0   | 0.0   | 0.0  | 0.0   | 0.0  | 0.0  | 0.0   | 0.0  | 0.0  | 0.0  | 0.0  | 0.0  | 0.0  | 0.0  | 0.0  | 0.0  | 0.0  | 0.0  | 0.0  | 0.0  | 0.0  |
| Cytomegalovirus               | 0.0   | 0.0  | 0.0  | 0.0   | 0.0  | 0.0   | 0.0   | 0.0   | 0.0  | 0.0   | 0.0  | 0.0  | 0.0   | 0.0  | 0.0  | 0.0  | 0.1  | 0.0  | 0.0  | 0.0  | 0.0  | 0.0  | 0.0  | 0.0  | 0.0  | 0.0  | 0.0  |
| Alpha-Papillomavirus n        | 0.0   | 0.0  | 0.0  | 0.0   | 0.0  | 0.0   | 0.0   | 0.0   | 0.0  | 0.0   | 0.0  | 0.0  | 0.0   | 0.0  | 0.0  | 0.0  | 0.0  | 0.0  | 0.0  | 0.0  | 0.0  | 0.0  | 0.0  | 0.0  | 0.0  | 0.0  | 6.7  |
| Beta-Papillomavirus n         | 0.0   | 0.0  | 0.0  | 0.0   | 0.0  | 0.0   | 0.0   | 0.0   | 0.0  | 0.0   | 0.0  | 0.0  | 0.0   | 0.0  | 0.0  | 0.0  | 0.1  | 0.0  | 0.0  | 13.3 | 28.6 | 0.0  | 2.6  | 16.7 | 0.0  | 0.0  | 26.7 |
| Gamma-Papillomavirus n        | 0.0   | 0.0  | 0.0  | 0.0   | 0.0  | 0.0   | 0.0   | 0.0   | 0.0  | 0.0   | 0.0  | 0.0  | 0.0   | 0.0  | 0.0  | 0.0  | 0.1  | 0.0  | 0.0  | 0.0  | 0.0  | 0.0  | 1.3  | 0.0  | 0.0  | 0.0  |      |
| Chlorovirus                   | 0.0   | 0.0  | 0.0  | 0.0   | 0.0  | 0.0   | 0.0   | 0.0   | 0.0  | 0.0   | 0.0  | 0.0  | 0.0   | 0.0  | 0.0  | 0.0  | 0.0  | 0.0  | 0.0  | 0.0  | 0.0  | 0.0  | 0.0  | 0.0  | 0.0  | 0.0  | 0.0  |
| Polyomavirus BK               | 100.0 | 99.8 | 99.9 | 100.0 | 99.6 | 100.0 | 100.0 | 100.0 | 99.9 | 100.0 | 99.9 | 99.9 | 0.0   | 14.7 | 67.1 | 11.2 | 96.7 | 20.0 | 0.0  | 26.7 | 28.6 | 8.3  | 0.0  | 0.0  | 4.3  | 0.0  | 0.0  |
| Polyomavirus JC               | 0.0   | 0.0  | 0.0  | 0.0   | 0.0  | 0.0   | 0.0   | 0.0   | 0.0  | 0.0   | 0.1  | 0.1  | 8.2   | 51.6 | 0.0  | 1.1  | 0.0  | 0.0  | 40.0 | 0.0  | 0.0  | 0.0  | 0.0  | 0.0  | 0.0  | 0.0  | 0.0  |
| Totivirus                     | 0.0   | 0.0  | 0.0  | 0.0   | 0.0  | 0.0   | 0.0   | 0.0   | 0.0  | 0.0   | 0.0  | 0.0  | 0.0   | 0.0  | 0.0  | 0.0  | 0.1  | 0.0  | 0.0  | 0.0  | 0.0  | 8.3  | 0.0  | 0.0  | 0.0  | 0.0  | 0.0  |
| Lentivirus                    | 0.0   | 0.0  | 0.0  | 0.0   | 0.0  | 0.0   | 0.0   | 0.0   | 0.0  | 0.0   | 0.0  | 0.0  | 0.0   | 0.0  | 0.0  | 0.0  | 0.0  | 0.0  | 0.0  | 0.0  | 0.0  | 8.3  | 0.0  | 0.0  | 0.0  | 0.0  | 0.0  |
| Alpha-torquevirus             | 0.0   | 0.0  | 0.0  | 0.0   | 0.2  | 0.0   | 0.0   | 0.0   | 0.0  | 0.0   | 0.0  | 0.0  | 3.7   | 2.7  | 1.6  | 3.6  | 0.0  | 0.0  | 0.0  | 0.0  | 0.0  | 6.6  | 0.0  | 0.0  | 0.0  | 0.0  | 0.0  |
| Beta-torquevirus              | 0.0   | 0.0  | 0.0  | 0.0   | 0.0  | 0.0   | 0.0   | 0.0   | 0.0  | 0.0   | 0.0  | 0.0  | 0.0   | 0.1  | 0.0  | 0.0  | 0.0  | 0.0  | 0.0  | 0.0  | 0.0  | 0.0  | 0.0  | 0.0  | 0.0  | 0.0  | 0.0  |
| Gamma-torquevirus             | 0.0   | 0.0  | 0.0  | 0.0   | 0.0  | 0.0   | 0.0   | 0.0   | 0.0  | 0.0   | 0.0  | 0.0  | 0.0   | 0.0  | 0.0  | 0.0  | 0.0  | 0.0  | 0.0  | 0.0  | 0.0  | 0.0  | 0.0  | 0.0  | 0.0  | 0.0  | 0.0  |
| Begomovirus                   | 0.0   | 0.0  | 0.0  | 0.0   | 0.0  | 0.0   | 0.0   | 0.0   | 0.0  | 0.0   | 0.0  | 0.0  | 0.0   | 0.0  | 0.0  | 0.0  | 0.0  | 0.0  | 0.0  | 0.0  | 0.0  | 0.0  | 0.0  | 0.0  | 0.0  | 0.0  | 0.0  |
| Iarvirus                      | 0.0   | 0.0  | 0.0  | 0.0   | 0.0  | 0.0   | 0.0   | 0.0   | 0.0  | 0.0   | 0.0  | 0.0  | 0.0   | 0.0  | 0.0  | 0.0  | 0.0  | 0.0  | 0.0  | 0.0  | 0.0  | 0.0  | 0.0  | 0.0  | 0.0  | 0.0  | 0.0  |
| Sapovirus                     | 0.0   | 0.0  | 0.0  | 0.0   | 0.0  | 0.0   | 0.0   | 0.0   | 0.0  | 0.0   | 0.0  | 0.0  | 0.0   | 0.0  | 0.0  | 0.0  | 0.0  | 20.0 | 0.0  | 6.7  | 0.0  | 0.0  | 1.3  | 0.0  | 0.0  | 10.0 | 0.0  |
| Enterovirus                   | 0.0   | 0.0  | 0.0  | 0.0   | 0.0  | 0.0   | 0.0   | 0.0   | 0.0  | 0.0   | 0.0  | 0.0  | 0.0   | 0.0  | 0.0  | 0.0  | 0.0  | 0.0  | 0.0  | 0.0  | 0.0  | 0.0  | 0.0  | 0.0  | 0.0  | 0.0  | 0.0  |
| Mastadenovirus                | 0.0   | 0.0  | 0.1  | 0.0   | 0.0  | 0.0   | 0.0   | 0.0   | 0.0  | 0.0   | 0.0  | 0.0  | 0.0   | 0.0  | 0.2  | 0.0  | 0.1  | 0.0  | 20.0 | 20.0 | 0.0  | 8.3  | 3.9  | 8.3  | 91.3 | 30.0 | 20.0 |
| Other viruses                 | 0.0   | 0.0  | 0.0  | 0.0   | 0.0  | 0.0   | 0.0   | 0.0   | 0.0  | 0.0   | 0.0  | 0.0  | 0.0   | 0.0  | 0.0  | 0.1  | 0.1  | 20.0 | 20.0 | 13.3 | 14.3 | 25.0 | 1.3  | 0.0  | 0.0  | 30.0 | 6.7  |
| Unclassified Papillomaviridae | 0.0   | 0.0  | 0.0  | 0.0   | 0.0  | 0.0   | 0.0   | 0.0   | 0.0  | 0.0   | 0.0  | 0.0  | 0.0   | 0.0  | 0.0  | 0.0  | 0.3  | 20.0 | 0.0  | 13.3 | 14.3 | 0.0  | 1.3  | 16.7 | 0.0  | 10.0 | 26.7 |
| Unclassified Anelloviridae    | 0.0   | 0.1  | 0.0  | 0.0   | 0.2  | 0.0   | 0.0   | 0.0   | 0.1  | 0.0   | 0.0  | 0.0  | 87.9  | 30.8 | 31.1 | 83.8 | 0.1  | 0.0  | 0.0  | 0.0  | 0.0  | 25.0 | 81.6 | 16.7 | 0.0  | 0.0  | 0.0  |
| Unclassified viruses          | 0.0   | 0.0  | 0.0  | 0.0   | 0.0  | 0.0   | 0.0   | 0.0   | 0.0  | 0.0   | 0.0  | 0.0  | 0.2   | 0.1  | 0.0  | 0.0  | 2.6  | 20.0 | 0.0  | 6.7  | 14.3 | 16.7 | 0.0  | 41.7 | 4.3  | 10.0 | 6.7  |

The relative abundance values are calculated from the total read counts for each virus.
